# Supplementary material
Source: PubMed Central journal article supplement (PMC3906965)

## SUPPLEMENTARY DATA

Table S1. Additional information for the sampled populations.

| Population number | Year of sampling | Country     | Latitude (°) | Longitude (°) | Elevation (m above sea level) | Number of sampled shrubs | Number of sampled SP2 seeds | Number of sampled SP3 seeds | Weather station                | Source weather data                                                         |
|-------------------|------------------|-------------|--------------|---------------|-------------------------------|--------------------------|-----------------------------|-----------------------------|--------------------------------|-----------------------------------------------------------------------------|
| 1                 | 2010             | Poland      | 54.196       | 17.965        | 190                           | 6                        | 148                         | 116                         | Limnological Station, Borucino | <a href="http://www.ug.gda.pl">http://www.ug.gda.pl</a> <sup>(1)</sup>      |
| 2                 | 2010             | France      | 44.032       | 5.349         | 810                           | 5                        | 191                         | 100                         | Saint Christol                 | <a href="http://www.meteofrance.com">www.meteofrance.com</a>                |
| 3                 | 2010             | France      | 44.101       | 5.450         | 1007                          | 5                        | 162                         | 118                         | Saint Christol                 | <a href="http://www.meteofrance.com">www.meteofrance.com</a>                |
| 4                 | 2010             | France      | 43.979       | 5.473         | 1100                          | 5                        | 166                         | 121                         | Saint Christol                 | <a href="http://www.meteofrance.com">www.meteofrance.com</a>                |
| 5                 | 2010             | Ireland     | 54.456       | -8.374        | 19                            | 5                        | 171                         | 104                         | Ballyshannon                   | <a href="http://eca.knmi.nl/">http://eca.knmi.nl/</a> <sup>(2)</sup>        |
| 6                 | 2010             | Italy       | 43.456       | 11.417        | 358                           | 5                        | 171                         | 117                         | Gaiole in Chianti              | NA <sup>(*)</sup>                                                           |
| 7                 | 2010             | Sweden      | 64.233       | 19.785        | 179                           | 5                        | 115                         | 62                          | Vindeln-Sunnansjönäs           | <a href="http://www.smhi.se/">http://www.smhi.se/</a>                       |
| 8                 | 2010             | France      | 43.760       | 6.369         | 1285                          | 5                        | 167                         | 97                          | Comps-sur-Artuby               | <a href="http://france.meteofrance.com/">http://france.meteofrance.com/</a> |
| 9                 | 2010             | France      | 43.815       | 6.246         | 692                           | 5                        | 122                         | 84                          | Aiguines                       | <a href="http://france.meteofrance.com/">http://france.meteofrance.com/</a> |
| 10                | 2010             | UK          | 51.142       | -1.643        | 120                           | 5                        | 162                         | 139                         | Boscombe down                  | <a href="http://eca.knmi.nl/">http://eca.knmi.nl/</a> <sup>(2)</sup>        |
| 11                | 2010             | Spain       | 43.020       | -6.228        | 1420                          | 5                        | 149                         | 73                          | Leon Virgen del Camino         | <a href="http://eca.knmi.nl/">http://eca.knmi.nl/</a> <sup>(2)</sup>        |
| 12                | 2010             | Sweden      | 59.848       | 17.778        | 36                            | 5                        | 126                         | 122                         | Uppsala                        | <a href="http://www.smhi.se/">http://www.smhi.se/</a>                       |
| 13                | 2010             | Italy       | 43.232       | 11.176        | 320                           | 5                        | 173                         | 124                         | Siena Orto Botanico            | <a href="http://www.biometeo.it">http://www.biometeo.it</a>                 |
| 14                | 2010             | Austria     | 47.272       | 11.265        | 805                           | 5                        | 105                         | 159                         | Innsbruck-Flughafen            | ZAMG Tirol und Vorarlberg                                                   |
| 15                | 2010             | France      | 49.786       | 2.305         | 100                           | 5                        | 142                         | 123                         | Glisy                          | <a href="http://france.meteofrance.com/">http://france.meteofrance.com/</a> |
| 16                | 2010             | Germany     | 49.973       | 11.308        | 450                           | 5                        | 163                         | 109                         | Bamberg                        | <a href="http://www.dwd.de/">http://www.dwd.de/</a>                         |
| 17                | 2010             | Switzerland | 46.861       | 9.229         | 2128                          | 3                        | 69                          | 63                          | Crap Masegn - Schneestation    | <a href="http://www.slf.ch/">http://www.slf.ch/</a> <sup>(3)</sup>          |
| 18                | 2010             | Germany     | 52.929       | 9.353         | 40                            | 5                        | 162                         | 130                         | Rotenburg                      | <a href="http://www.dwd.de/">http://www.dwd.de/</a>                         |
| 19                | 2010             | Germany     | 50.755       | 8.320         | 419                           | 5                        | 174                         | 122                         | Dillenburg                     | <a href="http://www.dwd.de/">http://www.dwd.de/</a>                         |
| 20                | 2010             | Sweden      | 59.184       | 18.375        | 4                             | 5                        | 165                         | 97                          | Stockholm                      | <a href="http://www.smhi.se/">http://www.smhi.se/</a>                       |

|    |      |             |        |        |      |   |     |     |                                     |                                                                                  |
|----|------|-------------|--------|--------|------|---|-----|-----|-------------------------------------|----------------------------------------------------------------------------------|
| 21 | 2010 | Sweden      | 56.537 | 16.474 | 45   | 5 | 157 | 128 | Ölandsbron                          | <a href="http://www.smhi.se/">http://www.smhi.se/</a>                            |
| 22 | 2010 | France      | 43.260 | 0.870  | 300  | 5 | 167 | 122 | Toulouse-Blagnac                    | <a href="http://eca.knmi.nl/">http://eca.knmi.nl/</a> <sup>(2)</sup>             |
| 23 | 2010 | Norway      | 62.225 | 9.548  | 1030 | 5 | 144 | 105 | Fokstugu                            | <a href="http://met.no/">http://met.no/</a>                                      |
| 24 | 2010 | Sweden      | 55.665 | 13.371 | 70   | 5 | 147 | 122 | Lund                                | <a href="http://www.smhi.se/">http://www.smhi.se/</a>                            |
| 25 | 2010 | UK          | 51.226 | -0.437 | 175  | 5 | 117 | 171 | Mickleham                           | <a href="http://www.metoffice.gov.uk/">http://www.metoffice.gov.uk/</a>          |
| 26 | 2010 | Germany     | 51.948 | 13.491 | 115  | 5 | 143 | 140 | Baruth                              | <a href="http://www.dwd.de/">http://www.dwd.de/</a>                              |
| 27 | 2010 | Spain       | 41.790 | -2.839 | 1240 | 5 | 176 | 52  | Soria                               | <a href="http://eca.knmi.nl/">http://eca.knmi.nl/</a> <sup>(2)</sup>             |
| 28 | 2010 | Netherlands | 51.549 | 6.012  | 50   | 5 | 175 | 112 | Arcen                               | <a href="http://eca.knmi.nl/">http://eca.knmi.nl/</a> <sup>(2)</sup>             |
| 29 | 2010 | Belgium     | 50.443 | 5.868  | 535  | 5 | 161 | 95  | Mont-Rigi                           | <a href="http://www.kmi.be">http://www.kmi.be</a>                                |
| 30 | 2010 | Germany     | 50.211 | 6.384  | 595  | 5 | 191 | 106 | Schneifelforsth<br>us               | <a href="http://www.dwd.de/">http://www.dwd.de/</a>                              |
| 31 | 2010 | Belgium     | 50.100 | 5.185  | 345  | 5 | 173 | 116 | Humain                              | <a href="http://www.kmi.be">http://www.kmi.be</a>                                |
| 32 | 2010 | France      | 44.864 | 5.479  | 1500 | 5 | 224 | 9   | IIserech2                           | <a href="http://eca.knmi.nl/">http://eca.knmi.nl/</a> <sup>(2)</sup>             |
| 33 | 2010 | Italy       | 45.871 | 11.653 | 619  | 5 | 163 | 80  | Pove del Grappa<br>loc. Pra' Gollin | <a href="http://www.arpa.veneto.it">http://www.arpa.veneto.it</a> <sup>(4)</sup> |
| 34 | 2010 | Italy       | 45.888 | 11.474 | 1095 | 5 | 163 | 99  | Asiago<br>(aeroporto)               | <a href="http://www.arpa.veneto.it">http://www.arpa.veneto.it</a> <sup>(4)</sup> |
| 35 | 2008 | Sweden      | 56.576 | 16.604 | 45   | 8 | 287 | 55  | Ölandsbron                          | <a href="http://www.smhi.se/">http://www.smhi.se/</a>                            |
| 36 | 2008 | Poland      | 52.594 | 23.343 | 100  | 7 | 131 | 228 | Brest                               | <a href="http://eca.knmi.nl/">http://eca.knmi.nl/</a> <sup>(2)</sup>             |
| 37 | 2008 | Germany     | 50.021 | 11.085 | 440  | 8 | 153 | 260 | Bamberg                             | <a href="http://www.dwd.de/">http://www.dwd.de/</a>                              |
| 38 | 2008 | Germany     | 47.863 | 11.508 | 550  | 7 | 126 | 173 | Muenchen                            | <a href="http://eca.knmi.nl/">http://eca.knmi.nl/</a> <sup>(2)</sup>             |
| 39 | 2008 | Belgium     | 50.920 | 5.554  | 80   | 7 | 155 | 197 | Ell                                 | <a href="http://eca.knmi.nl/">http://eca.knmi.nl/</a> <sup>(2)</sup>             |
| 40 | 2008 | Belgium     | 51.017 | 5.577  | 75   | 8 | 168 | 277 | Ell                                 | <a href="http://eca.knmi.nl/">http://eca.knmi.nl/</a> <sup>(2)</sup>             |
| 41 | 2008 | Netherlands | 52.280 | 6.520  | 50   | 8 | 126 | 246 | Hupsel                              | <a href="http://eca.knmi.nl/">http://eca.knmi.nl/</a> <sup>(2)</sup>             |
| 42 | 2008 | Netherlands | 52.792 | 6.625  | 50   | 8 | 159 | 260 | Hoogeveen                           | <a href="http://eca.knmi.nl/">http://eca.knmi.nl/</a> <sup>(2)</sup>             |

(\*) No data available

(1) Limnological Station, Borucino - Meteorology and Climatology Department - University of Gdansk, Poland

(2) Klein Tank, A.M.G. and Coauthors, 2002. Daily dataset of 20th-century surface air temperature and precipitation series for the European Climate Assessment. Int. J. of Climatol., 22, 1441-1453.

(3) Données du SLF © 2012, SLF

(4) Agenzia Regionale per la Prevenzione e Protezione Ambientale del Veneto, Dipartimento per la Sicurezza del Territorio, Centro Meteorologico - Ufficio Validazione Dati e Climatologia

Table S2. Detail of the seasons that were taken into account for calculation the  $GDD_{>0^{\circ}C}$  of the spring of pollination, the summer of fertilization and the year of embryo development for SP2-seeds with a ripen time of three years (SP2RT3) and two years (SP2RT2) and for SP3-seeds with a ripen time of three years (SP3RT3) and two years (SP3RT2).

|                         | Season (*) | SP2RT3        | SP2RT2        | SP3RT3             | SP3RT2             |
|-------------------------|------------|---------------|---------------|--------------------|--------------------|
| Year of sampling        | Winter     |               |               |                    |                    |
|                         | Autumn     |               |               | embryo development | embryo development |
|                         | Summer     | fertilization | fertilization | embryo development | embryo development |
|                         | Spring     |               | pollination   | embryo development | embryo development |
|                         | Winter     |               |               | embryo development | embryo development |
| 1 year before sampling  | Winter     |               |               | embryo development | embryo development |
|                         | Autumn     |               |               | embryo development | embryo development |
|                         | Summer     |               |               | fertilization      | fertilization      |
|                         | Spring     | pollination   |               |                    | pollination        |
|                         | Winter     |               |               |                    |                    |
| 2 years before sampling | Winter     |               |               |                    |                    |
|                         | Autumn     |               |               |                    |                    |
|                         | Summer     |               |               |                    |                    |
|                         | Spring     |               |               | pollination        |                    |
|                         | Winter     |               |               |                    |                    |

(\*) Winter (20/12-20/3); Autumn (21/9-20/12); Summer (21/6-20/9); Spring (21/3-20/6).

Table S3. Pearson's correlation between three environmental variables. All of the correlations had a *P*-value higher than 0.05.

|                                   | Growing degree-days year before sampling | Potentially acidifying deposition |
|-----------------------------------|------------------------------------------|-----------------------------------|
| Potentially acidifying deposition | 0.222                                    |                                   |
| Annual precipitation              | -0.301                                   | 0.126                             |

Fig. S1. Location and population number of the sampled juniper populations.

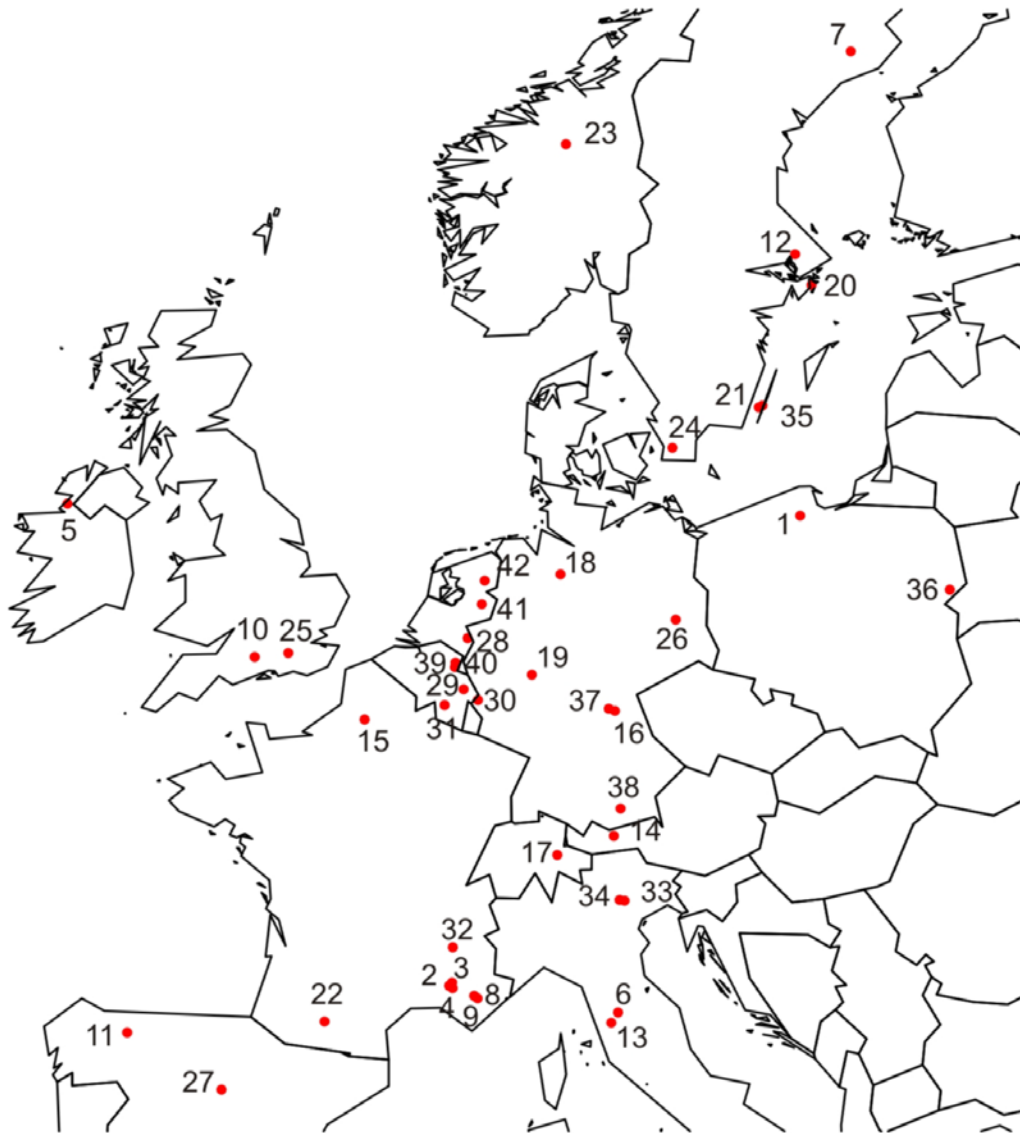

Supplement: supp_mct272_mct272supp.pdf [file supp_mct272_mct272supp.pdf]
